# Supplementary material for: Neural activity tracking identity and confidence in social information
Source: PubMed Central journal article supplement (PMC9917428; doi:10.7554/elife.71315), 2023-02-10
Supplement: elife-71315-supp1.pdf [file elife-71315-supp1.pdf]

**Supplementary File 1, relates to Figure 4 and Figure 4 – figure supplement 1.**

| Contrast                                                    | Region                         | Peak Coordinates x/y/z<br>(in mm MNI Space) | Z Value |
|-------------------------------------------------------------|--------------------------------|---------------------------------------------|---------|
| <b>Social condition: past judgment</b>                      | dmPFC                          | 2, 46, 34                                   | -4.1    |
|                                                             | Right pTPJ                     | 48 -64 42                                   | -4.4    |
|                                                             | Inferior Parietal gyrus (left) | -46 -58 48                                  | -3.8    |
|                                                             | Precuneus                      | -2, -64, 38                                 | -4.6    |
|                                                             | Dorsolateral prefrontal cortex | -46 34 -12                                  | -3.6    |
|                                                             | Left STS                       | -64 -26 -6                                  | -3.5    |
| <b>Social condition: current judgment</b>                   | Striatum (right)               | 6 18 0                                      | +3.6    |
|                                                             | ACC gyrus                      | 4 40 14                                     | +3.6    |
|                                                             | Insular (right)                | 4 12 0                                      | +3.8    |
| <b>Non-social: current judgment</b>                         | ACC sulcus                     | 6 42 18                                     | +4.4    |
|                                                             | Insular (right)                | 42 22 0                                     | +4.1    |
|                                                             | OFC (bilateral, here left)     | -38 18 -12                                  | +4.2    |
| Family-wise error cluster corrected, $z > 2.3$ , $p < 0.05$ |                                |                                             |         |
