# Supplementary material for: Neural activity tracking identity and confidence in social information
Source: eLife. 2023 Feb 10;12:e71315. doi: 10.7554/eLife.71315 (PMC9917428; doi:10.7554/eLife.71315)
Supplement: Figure 2—source data 1. — Further, it includes regression weights shown in Figure 2d for the effects of accuracy, and the effect of uncertainty. It also includes values for the learning index for the first and remaining updates, Figure 2e. Source data include values for both social and non-social conditions. [file elife-71315-fig2-data1.xlsx]

## Sheet: Fig2a
	condition
subjects	social	non-social
1	3.96111	4.61111
2	4.62778	5.16667
3	4.02778	4.22222
4	4.57778	4.33889
5	4.26111	4.42222
6	3.90556	5.25
7	4.94444	4.66111
8	4.40556	4.67778
9	3.82222	3.81667
10	3.97778	4.01667
11	4.58333	4.78889
12	5.91111	5.50556
13	3.82222	4.18333
14	4.14444	3.98333
15	3.78889	3.85
16	4.33889	4.33333
17	4.21111	4.12222
18	5.07778	5.74444
19	4.09444	4.15
20	4.12778	4.49444
21	4.19444	4.05556
22	4.16667	4.61667
23	5.28889	5.7
24	5.08333	5.41111

## Sheet: Fig2b
subjects	condition
	social	non-social
1	1.53125	1.61006
2	3.8481	4.43671
3	0.71519	0.917722
4	2.71975	2.49367
5	2.01274	1.55063
6	1.6875	2.39024
7	1.575	1.33333
8	0.955975	1.27044
9	1.13291	1.60377
10	1.12025	1.32278
11	2.55063	2.89809
12	2.53165	2.86792
13	1.7707	1.9557
14	1.57325	1.38608
15	0.920245	1.19136
16	1.11321	1.25157
17	1.81646	1.43671
18	1.03797	1.45
19	1.20755	1.0125
20	1.5	1.8481
21	0.944099	1.09554
22	0.942675	1.39873
23	1.39241	1.53797
24	1.64331	2.07006

## Sheet: Fig2c
subjects	condition
	social	non-social
1	4	1
2	9	8
3	14	23
4	7	17
5	6	8
6	13	19
7	6	14
8	13	8
9	9	22
10	7	11
11	33	17
12	3	3
13	9	20
14	4	13
15	12	17
16	29	40
17	9	13
18	16	10
19	13	22
20	18	26
21	42	40
22	1	4
23	14	10
24	10	16

## Sheet: Fig2d_accuracy
	condition
subID	social	non-social
1	0.60808	0.340183
2	-0.188504	-0.194237
3	-0.13113	-0.0468987
4	-0.0971545	0.670297
5	0.0901766	0.0504777
6	-0.0210126	0.877577
7	0.5704	-0.028419
8	0.211647	0.345096
9	0.238818	-0.384565
10	0.324989	0.314339
11	-0.365362	-0.569377
12	0.488158	1.05932
13	0.406414	0.400677
14	0.682786	0.391831
15	0.441569	0.0744444
16	0.415413	0.212837
17	0.68801	0.636211
18	0.280783	0.530855
19	-0.137552	-0.0986106
20	0.607461	0.434852
21	0.115714	0.230503
22	0.293468	0.206413
23	0.405211	0.420505
24	1.36946	0.148154
	accuracy effect

## Sheet: Fig2d_uncertainty
	condition
subID	social	non-social
1	-0.319889	-0.69015
2	-0.857631	-0.835291
3	-0.137596	0.0198647
4	0.158987	-0.236431
5	-0.357596	-0.380299
6	-0.198634	-0.353687
7	0.10516	-0.0939194
8	0.129946	-0.135669
9	-0.0017798	-0.26973
10	0.176893	-0.614817
11	0.262552	-0.486164
12	0.5559	-0.190641
13	-0.304225	0.169172
14	0.565744	-0.25547
15	-0.030524	-0.0325479
16	0.240154	-0.139506
17	-0.196954	0.0842915
18	0.0206692	-0.722438
19	-0.0442325	-0.312509
20	0.162917	-0.129576
21	-0.057236	0.177524
22	0.303055	0.0908248
23	0.114609	0.0217766
24	0.684572	-0.117291
uncertainty effect

## Sheet: Fig2e_learningindex
	first update			remaining updates (without first update)
subID	social	non-social		social	non-social
1	0.84902	0.441228		0.554735	0.61379
2	1.65358	2.02075		1.4066	1.47002
3	0.411219	0.403968		0.252452	0.285819
4	1.427	1.54533		0.77963	0.782981
5	1.54723	0.85325		0.495469	0.395197
6	1.40351	1.10497		0.578277	0.75165
7	1.18022	0.712037		0.431942	0.423459
8	0.604971	0.357222		0.339549	0.413452
9	0.738596	0.388287		0.395758	0.621402
10	0.403333	0.606818		0.354559	0.389768
11	0.875902	1.02794		0.733458	0.755525
12	0.648268	1.06663		0.7105	0.829313
13	1.24102	0.644246		0.613154	0.731885
14	0.775439	0.610185		0.485232	0.442989
15	0.65	0.761376		0.277188	0.378182
16	0.469583	0.396667		0.337178	0.422015
17	0.791383	0.80303		0.54257	0.474453
18	0.419955	0.29252		0.326144	0.389767
19	0.66125	0.372222		0.39956	0.363551
20	0.696717	0.729403		0.53795	0.520782
21	0.278947	0.507895		0.323588	0.30327
22	0.733333	0.505026		0.380145	0.498224
23	0.748259	0.734237		0.412049	0.378637
24	0.694794	0.77881		0.442317	0.771096
