# Supplementary material for: Neural activity tracking identity and confidence in social information
Source: eLife. 2023 Feb 10;12:e71315. doi: 10.7554/eLife.71315 (PMC9917428; doi:10.7554/eLife.71315)
Supplement: Figure 4—source data 1. — Source data include values for both social and non-social conditions. [file elife-71315-fig4-data1.xlsx]

## Sheet: Fig4a_dmpfc
	conditions
subjects	social	non-social
1	-14.3349	33.174
2	-52.2957	9.22879
3	-31.0746	44.2963
4	3.58836	13.838
5	-18.7991	7.09661
6	-16.0711	-2.78526
7	16.593	19.6954
8	-21.7109	6.09868
9	-79.5641	6.40426
10	-41.4034	14.3309
11	-25.4255	-37.0327
12	33.5333	10.849
13	-16.3473	-54.4695
14	3.31964	-14.5418
15	13.0803	-7.72302
16	-30.6135	-4.77807
17	-2.87519	36.8265
18	8.94008	-11.9758
19	4.60059	0.0186811
20	-57.9604	-14.9047
21	8.26313	13.0755
22	-12.3301	-7.74775
23	4.7102	2.38295
24	-11.5741	10.5954

## Sheet: Fig4b_ptpj
	conditions
subjects	social	non-social
1	-34.0992	0.183976
2	-44.5438	5.38976
3	-23.9725	8.63681
4	-20.0303	-15.8555
5	-31.5016	11.0799
6	-8.11442	-13.2927
7	9.64156	10.6148
8	-36.8786	-30.5391
9	6.07175	5.22708
10	-50.0587	3.21145
11	-33.67	-15.7799
12	7.37116	1.14634
13	28.3265	-29.9006
14	-16.2978	-26.028
15	0.563022	-11.9427
16	-14.6009	-14.8439
17	-3.00027	34.1384
18	-14.5012	-21.5725
19	-33.8437	-27.861
20	-39.6198	-4.65491
21	-27.5546	-16.3138
22	-41.6131	-31.1173
23	-4.92525	-6.20284
24	-46.7467	-5.02072

## Sheet: Fig4e_dmpfc
	social in dmpfc
subjects	current confidence	past confidence
1	23.2167	-37.5516
2	-20.4318	-31.8639
3	34.4679	-65.5425
4	27.0054	-23.417
5	-7.77517	-11.024
6	-6.37117	-9.69988
7	9.62672	6.96632
8	1.63899	-23.3499
9	-34.3666	-45.1975
10	-14.6215	-26.7819
11	-27.5574	2.13186
12	2.3194	31.2139
13	18.9759	-35.3232
14	19.4096	-16.09
15	30.6472	-17.5669
16	-27.5676	-3.0459
17	46.923	-49.7982
18	5.65359	3.28649
19	20.985	-16.3845
20	-20.2932	-37.6671
21	-22.1373	30.4004
22	2.60089	-14.931
23	32.478	-27.7678
24	21.3444	-32.9185

## Sheet: Fig4e_ptpj
	social in pTPJ
subjects	current confidence	past confidence
1	-9.99644	-24.1027
2	-17.1424	-27.4014
3	8.41284	-32.3854
4	5.67846	-25.7087
5	-5.14115	-26.3605
6	-8.75219	0.637769
7	1.18409	8.45747
8	-3.0592	-33.8194
9	-0.0810757	6.15283
10	-16.6258	-33.4328
11	-17.6413	-16.0287
12	14.6202	-7.24902
13	20.1987	8.12779
14	12.4961	-28.7939
15	16.953	-16.39
16	-22.9869	8.386
17	35.327	-38.3273
18	0.578433	-15.0796
19	-22.0973	-11.7464
20	-1.89372	-37.7261
21	-53.5504	25.9958
22	-13.8303	-27.7828
23	5.68759	-10.6128
24	0.925135	-47.6718

## Sheet: Fig4h_RSA_dmpfc
	conditions
subjects	social	non-social
1	-0.0955101	0.442856
2	0.0351031	1.8973
3	1.04194	-4.8195
4	0.980029	-0.494979
5	0.647196	1.21484
6	-2.92089	2.97097
7	0.873441	0.857816
8	-2.35654	1.29834
9	1.03702	2.57461
10	1.11653	7.36383
11	-1.4928	-0.720169
12	5.55519	-6.75224
13	0.0368847	0.846323
14	-1.40999	0.768568
15	-4.46667	-0.84663
16	-0.917117	-0.333649
17	-3.87915	1.37178
18	-0.797842	0.0306965
19	-0.554702	-0.14015
20	-0.0401811	0.0183765
21	0.473691	0.058353
22	-0.507991	-1.41121
23	0.053895	0.59798
24	-1.35942	1.31953

## Sheet: Fig4h_ptpj
	conditions
subjects	social	non-social
1	-0.151949	-0.464665
2	-4.49119	7.12702
3	-2.36034	-2.35565
4	4.10403	-0.380523
5	-3.04822	1.20079
6	-4.41853	-5.6663
7	0.739266	1.53296
8	-1.30118	0.240541
9	-0.0171118	1.04932
10	-3.14879	8.96441
11	-1.94967	-0.917729
12	5.58163	-8.62389
13	-2.19482	-2.84792
14	-0.616229	-1.33529
15	-5.72092	-4.63938
16	-0.25449	-3.50725
17	-2.70471	3.6877
18	0.312925	-3.69982
19	-3.46004	-1.05966
20	-3.42677	3.8008
21	-2.59567	-3.09192
22	-2.6853	0.894072
23	-2.18495	-2.35024
24	-1.18963	0.390925
